# Supplementary material for: Lead Impedance Change as a Prognostic Marker for Cardiac Resynchronization Therapy Response
Source: Research Square preprint supplement (doi:10.21203/rs.3.rs-7580282/v1), 2025-09-26
Supplement: Supplementary file 1 [file 4ab6e6546e760db93af801f7.docx]

# Supplementary Materials


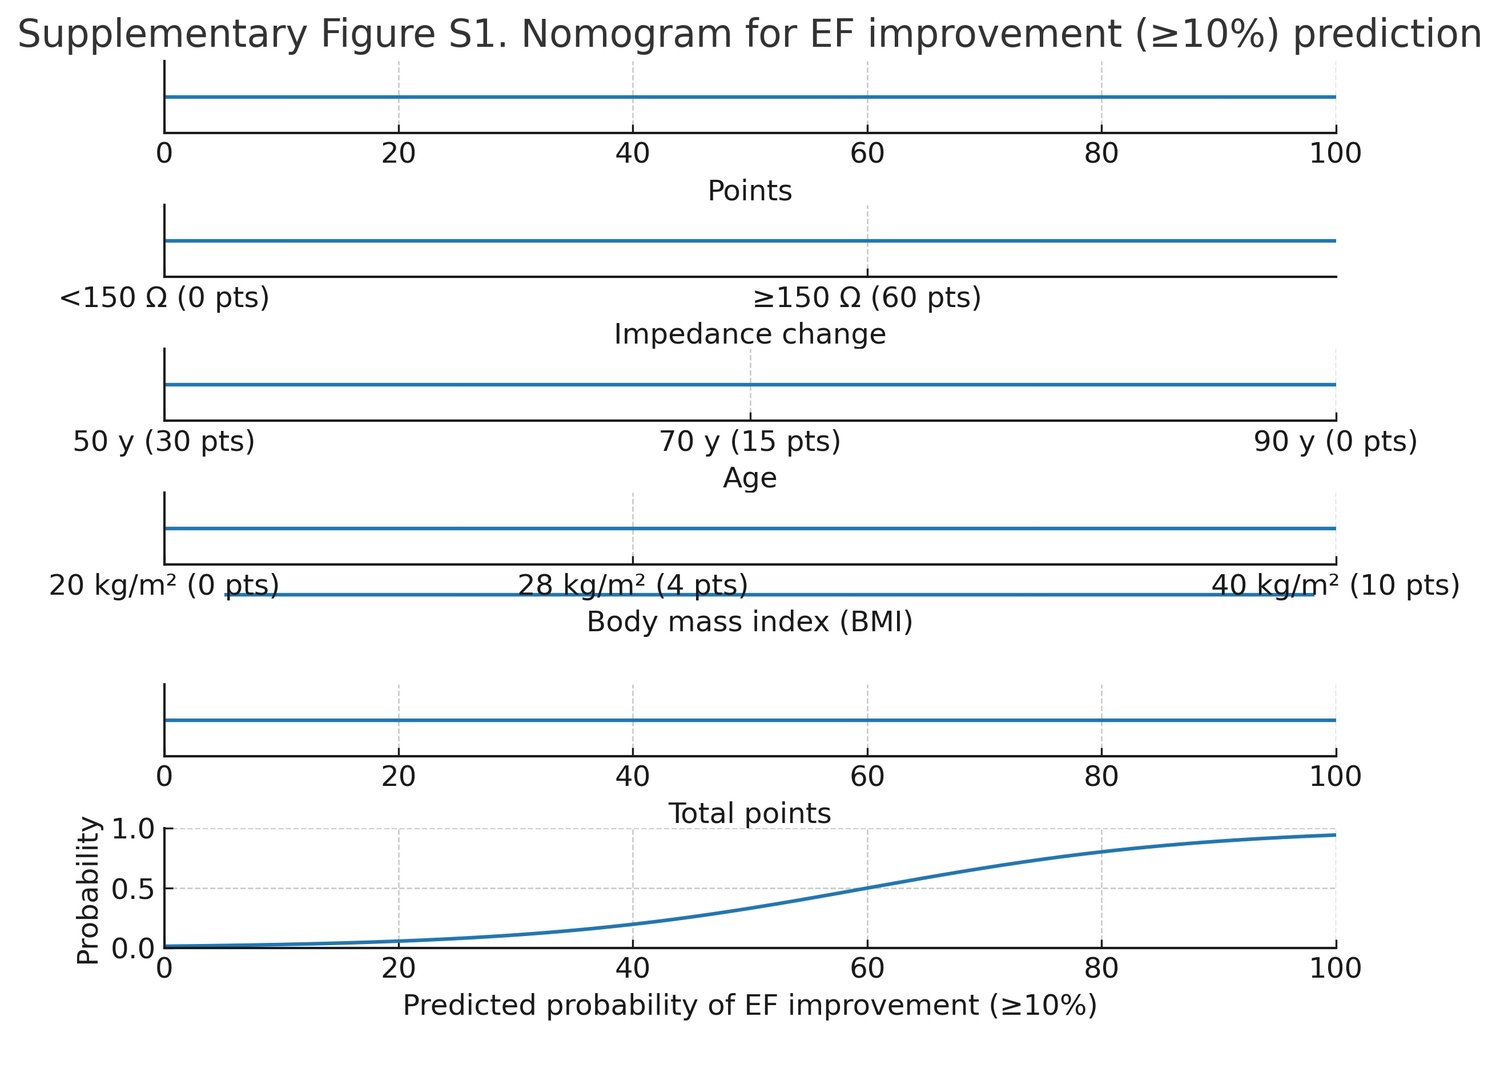


## Supplementary Fig. S1. Nomogram for CRT response prediction based on multivariable logistic regression including impedance change, age, and BMI.


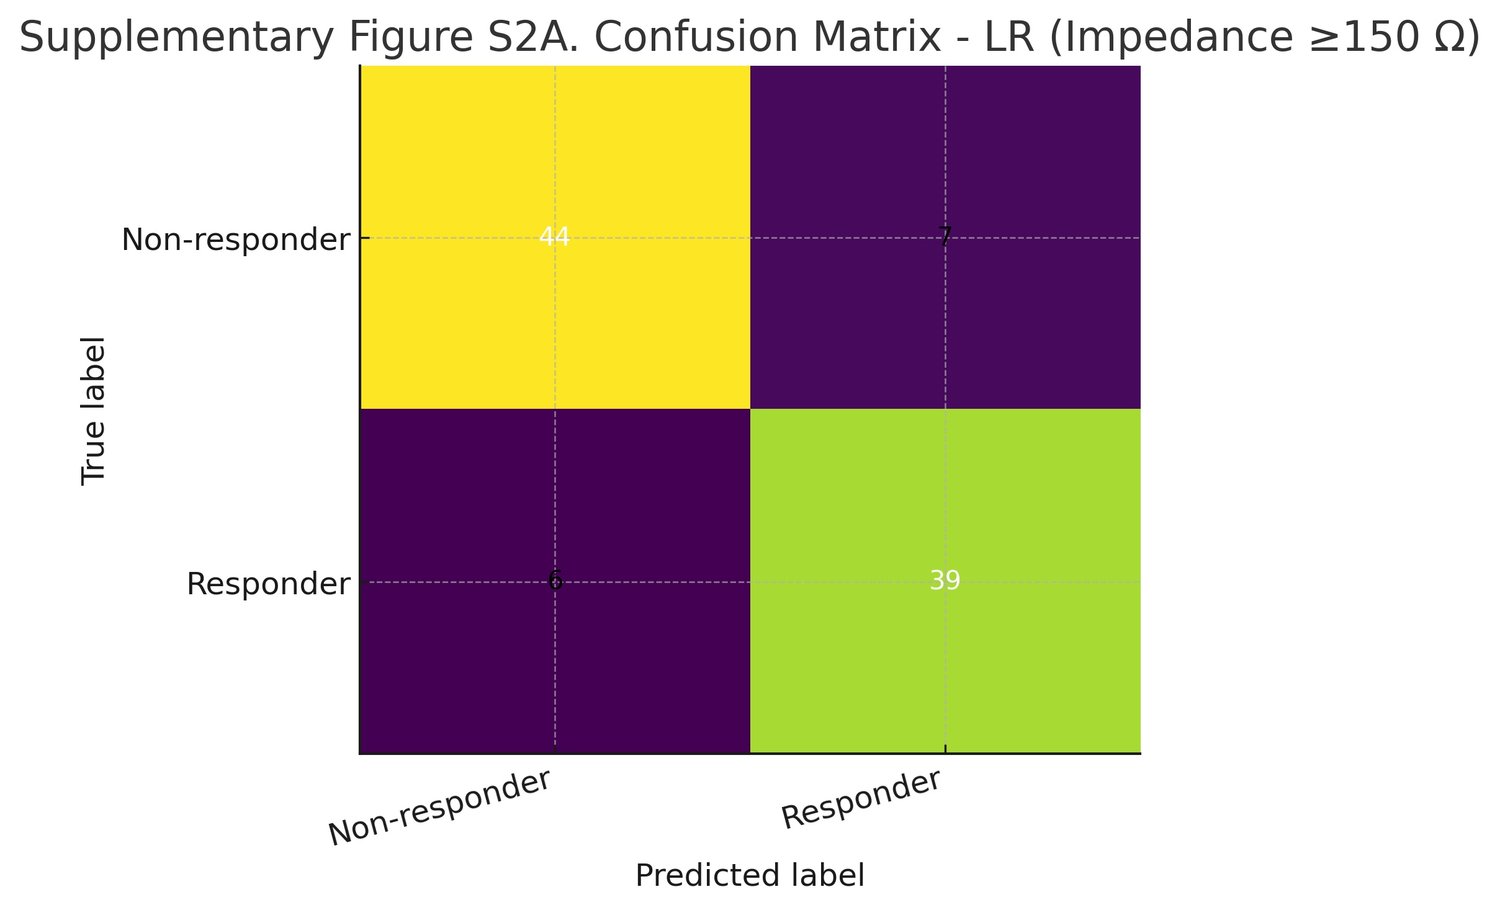


**Supplementary Fig. S2A.** Confusion matrix for univariate logistic regression (impedance ≥150 Ω; accuracy 86.5%).


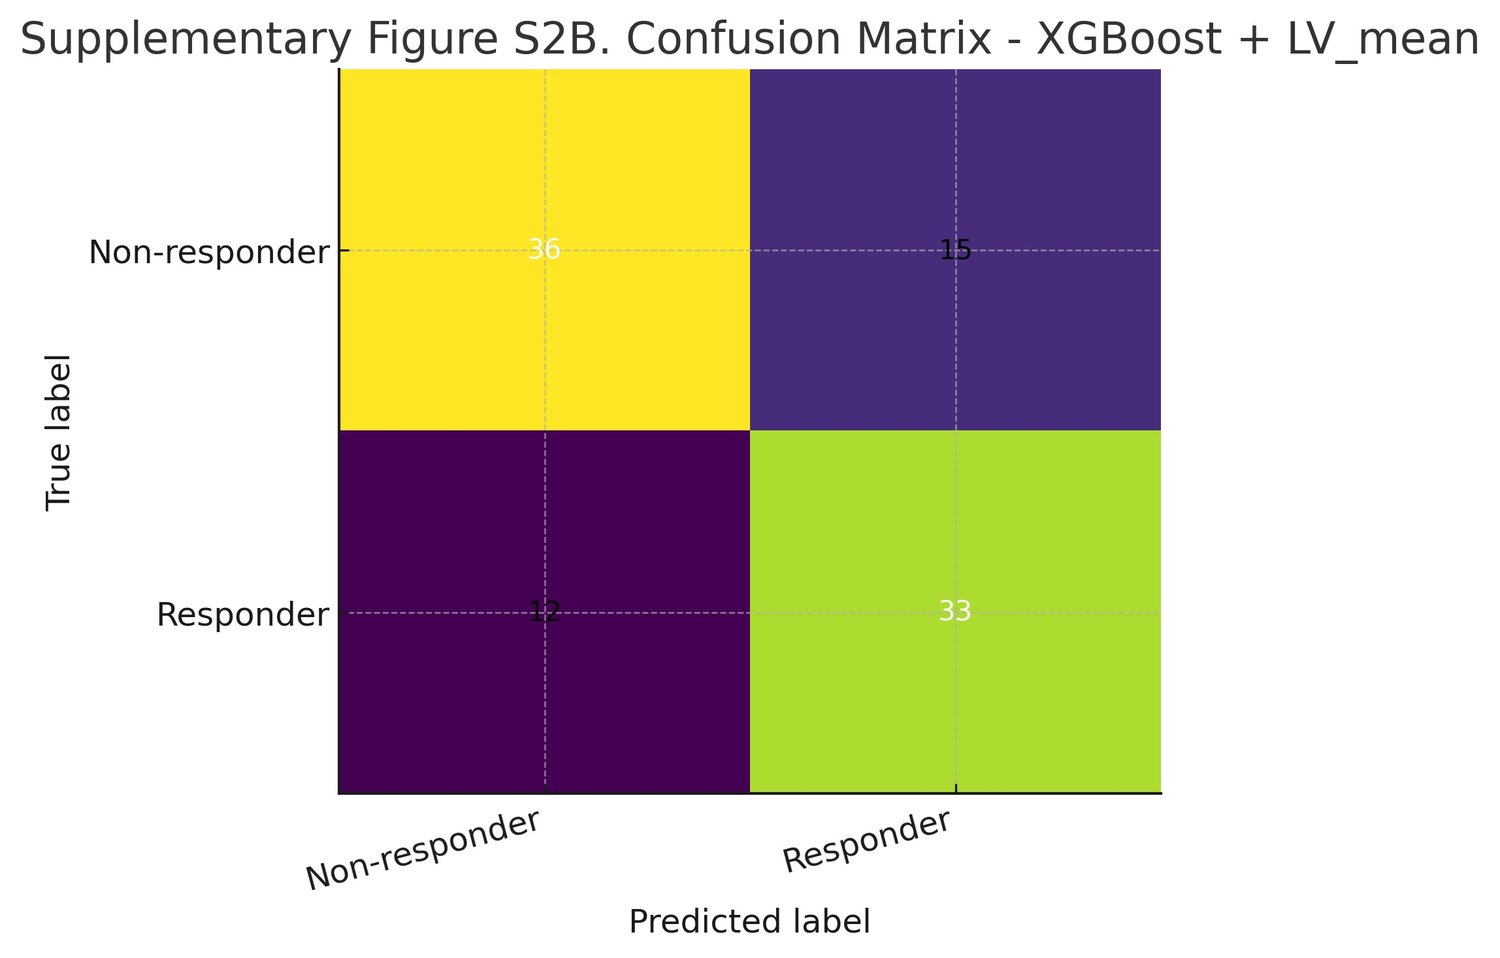


## Supplementary Fig. S2B. Confusion matrix for XGBoost model with impedance, age, BMI, and LV_mean (overall accuracy ~72%).


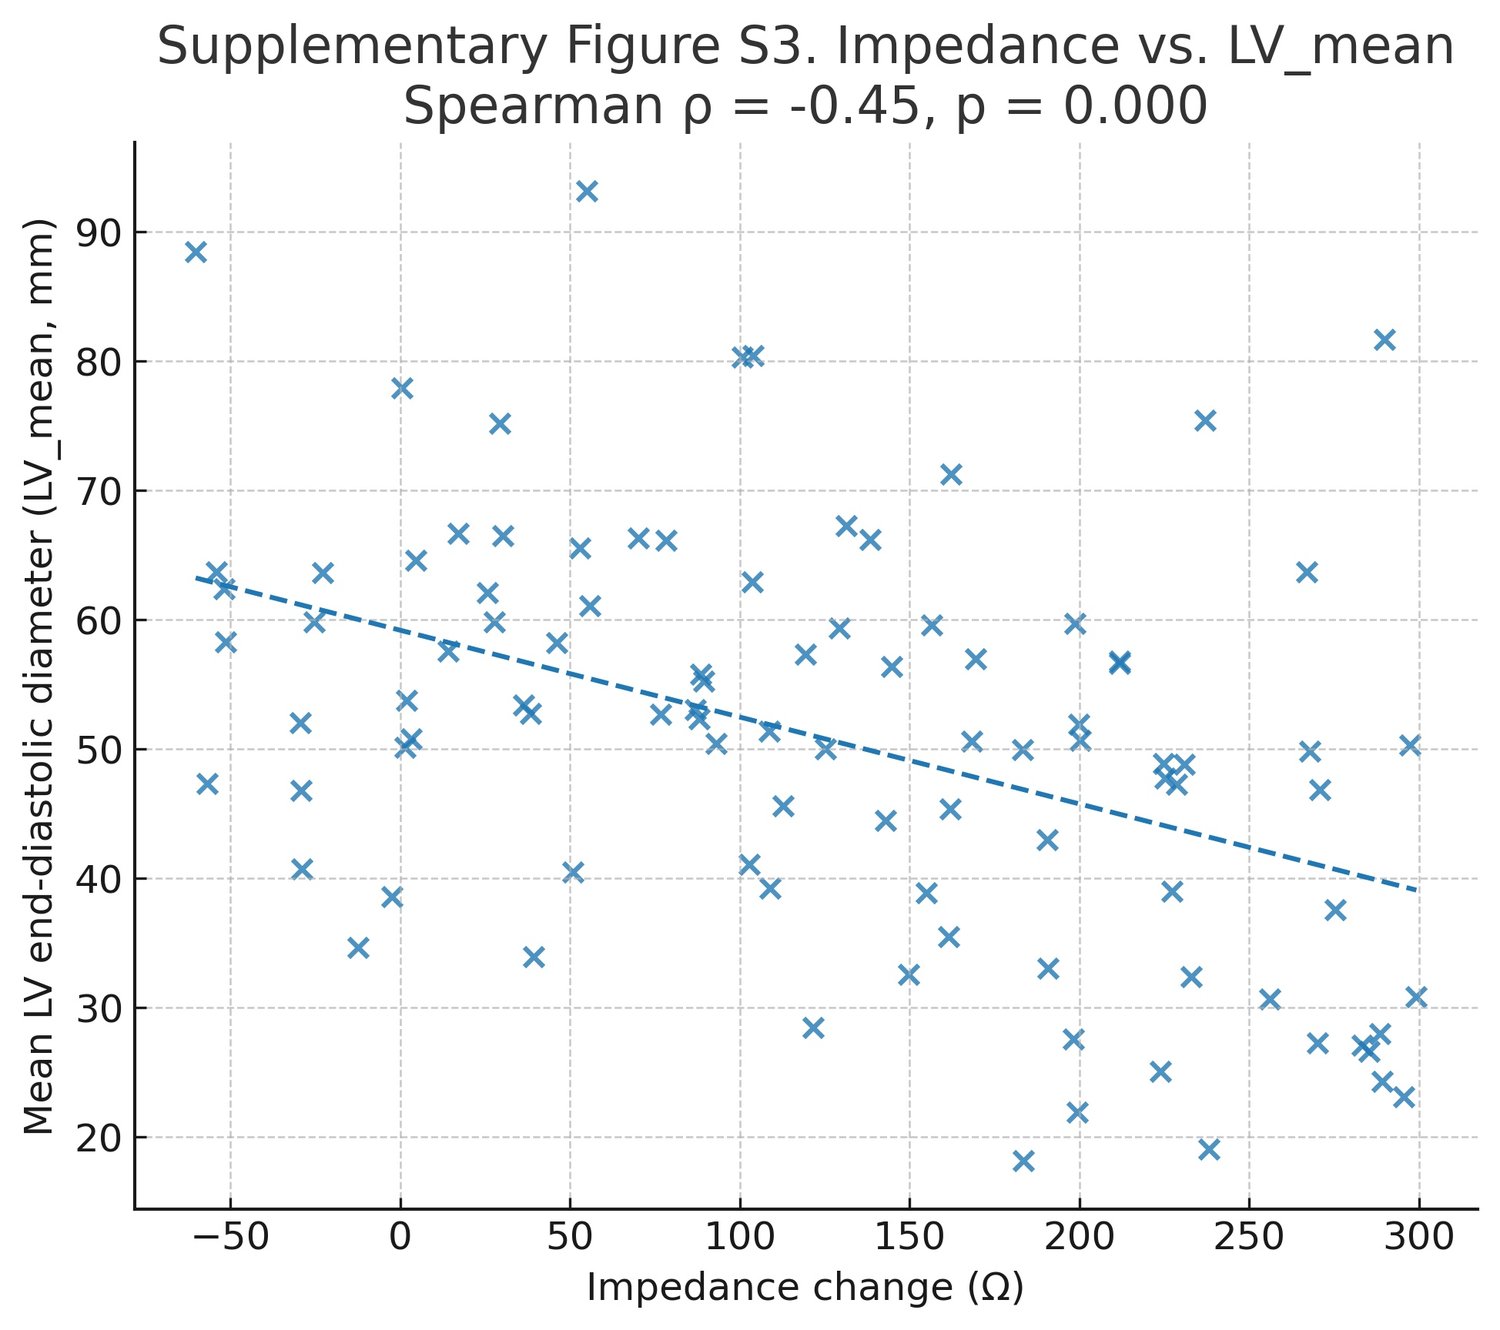


## Supplementary Fig. S3. Correlation between LV impedance change and LV_mean (ρ = –0.29, p = 0.007).


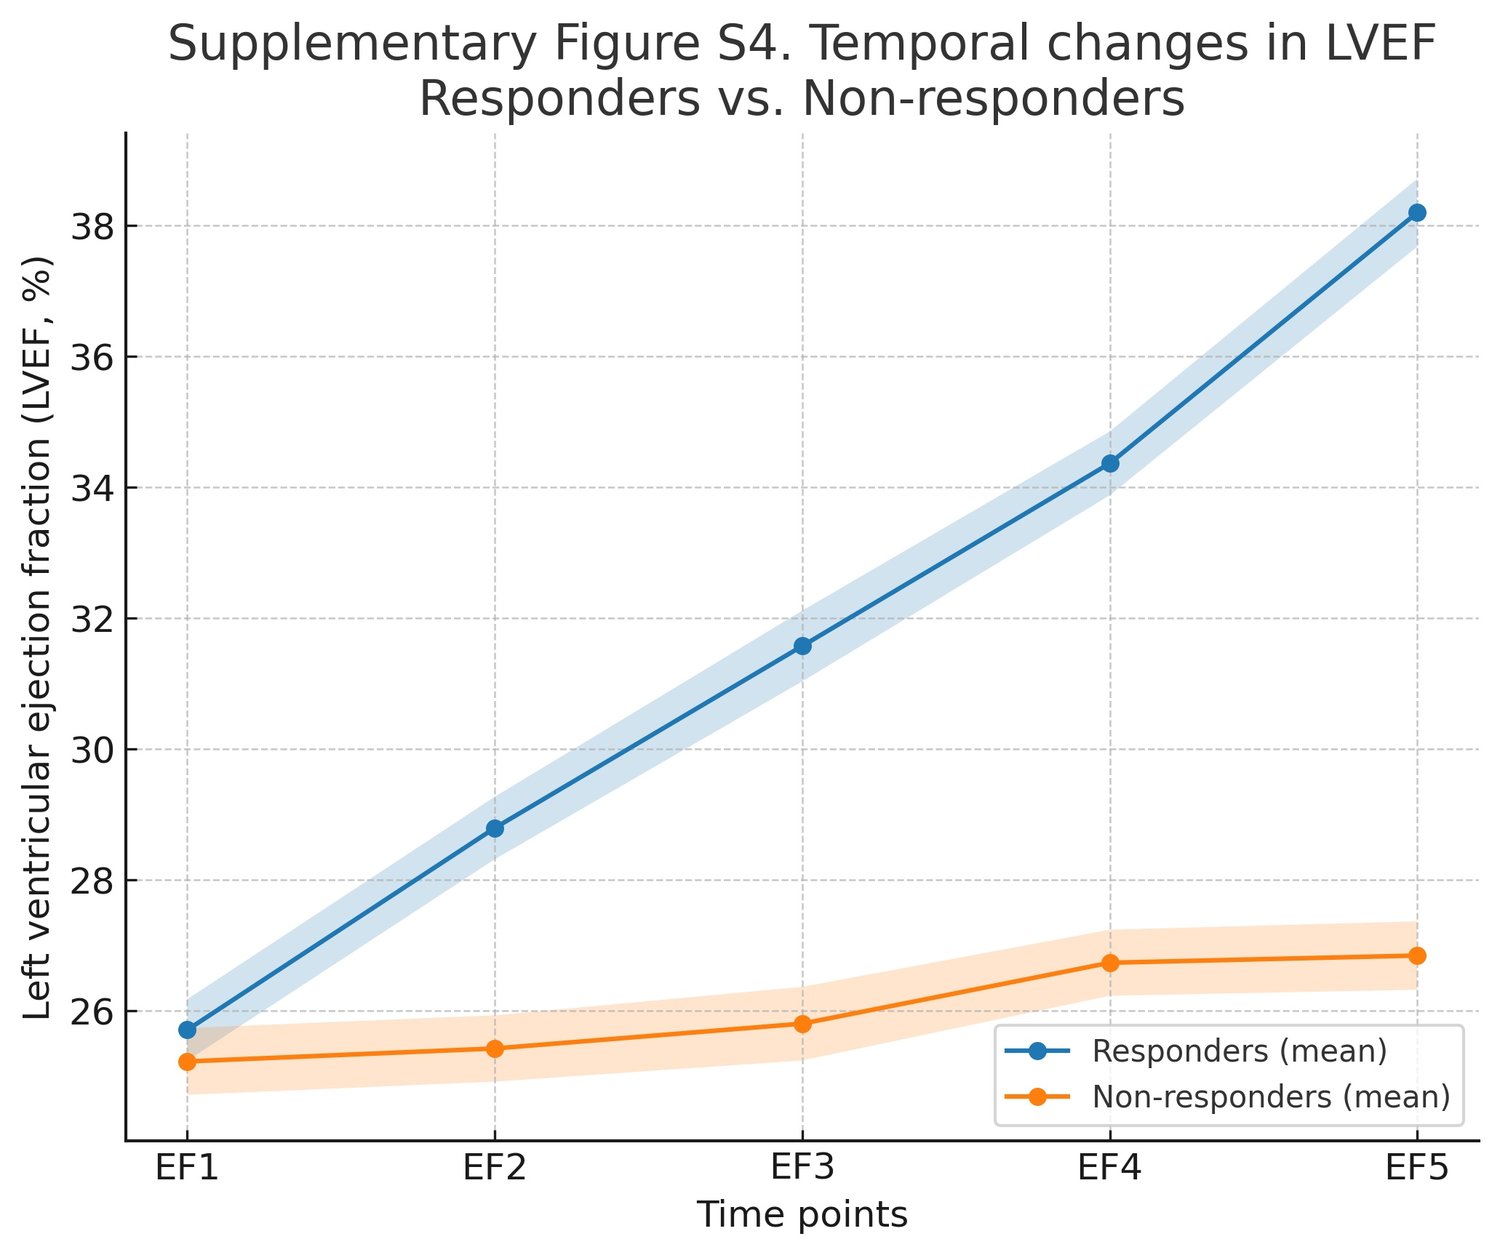


## Supplementary Fig. S4. Temporal changes in LVEF during follow-up: responders vs. non-responders.
